# Supplementary material for: Chelation-assisted CuAAC in star-shaped polymers enables fast self-healing at low temperatures
Source: Royal Society of Chemistry journal article supplement (doi:10.1039/c5py01818h), 2016-01-01
Supplement: c5py01818h1.pdf [file c5py01818h1.pdf]

# Chelation-assisted CuAAC of star-shaped polymers enables fast self-healing at low temperatures.

S. Neumann, D. Döhler, D. Ströhl and W. H. Binder\*

Chair of Macromolecular Chemistry, Institute of Chemistry, Division of Technical and Macromolecular Chemistry, Faculty of Natural Science II (Chemistry, Physics and Mathematics), Martin-Luther-University Halle-Wittenberg, von-Danckelmann-Platz 4, Halle D-06120, Germany.

\*Corresponding author, E-mail: [wolfgang.binder@chemie.uni-halle.de](mailto:wolfgang.binder@chemie.uni-halle.de); Fax: +49 345 55 27392

**Supporting Information**

## Table of contents

1. NMR- and IR-investigations for the synthesis of 2-(6-azidomethyl)-pyridine-4-carboxylic acid (**1a**) and 2-(6-azidomethyl)-pyridine-5-carboxylic acid (**1b**).
  - 1.1  $^1\text{H}$ -NMR of pyridine-2,4-carboxylic acid dimethylester (**1**) in  $\text{CDCl}_3$ .
  - 1.2  $^{13}\text{C}$ -NMR of pyridine-2,4-carboxylic acid dimethylester (**1**) in  $\text{CDCl}_3$ .
  - 1.3  $^1\text{H}$ -NMR of 2-(6-hydroxymethyl)-pyridine-4-carboxylic acid methylester (**2**) in  $\text{CDCl}_3$ .
  - 1.4  $^{13}\text{C}$ -NMR of 2-(6-hydroxymethyl)-pyridine-4-carboxylic acid methylester (**2**) in  $\text{CDCl}_3$ .
  - 1.5  $^1\text{H}$ -NMR of 2-(6-azidomethyl)-pyridine-4-carboxylic acid methylester (**3**) in  $\text{CDCl}_3$ .
  - 1.6  $^{13}\text{C}$ -NMR of 2-(6-azidomethyl)-pyridine-4-carboxylic acid methylester (**3**) in  $\text{CDCl}_3$ .
  - 1.7 IR-spectrum of 2-(6-hydroxymethyl)-pyridine-4-carboxylic acid methylester (**3**).
  - 1.8  $^1\text{H}$ -NMR of 2-(6-azidomethyl)-pyridine-4-carboxylic acid (**4 = 1a**) in  $\text{DMSO-d}_6$ .
  - 1.9  $^{13}\text{C}$ -NMR of 2-(6-azidomethyl)-pyridine-4-carboxylic acid (**4 = 1a**) in  $\text{DMSO-d}_6$ .
  - 1.10 IR-spectrum of 2-(6-azidomethyl)-pyridine-4-carboxylic acid (**4 = 1a**).
  - 1.11  $^1\text{H}$ -NMR of 2-(6-hydroxymethyl)-pyridine-5-carboxylic acid methylester (**5**) in  $\text{CDCl}_3$ .
  - 1.12  $^{13}\text{C}$ -NMR of 2-(6-hydroxymethyl)-pyridine-5-carboxylic acid methylester (**5**) in  $\text{CDCl}_3$ .
  - 1.13  $^1\text{H}$ -NMR of 2-(6-azidomethyl)-pyridine-5-carboxylic acid methylester (**6**) in  $\text{CDCl}_3$ .
  - 1.14  $^{13}\text{C}$ -NMR of 2-(6-hydroxymethyl)-pyridine-5-carboxylic acid methylester (**6**) in  $\text{CDCl}_3$ .
  - 1.15 IR-spectrum of 2-(6-hydroxymethyl)-pyridine-4-carboxylic acid methylester (**6**).
  - 1.16  $^1\text{H}$ -NMR of 2-(6-azidomethyl)-pyridine-5-carboxylic acid (**7 = 1b**) in  $\text{DMSO-d}_6$ .
  - 1.17  $^{13}\text{C}$ -NMR of 2-(6-azidomethyl)-pyridine-5-carboxylic acid (**7 = 1b**) in  $\text{DMSO-d}_6$ .
  - 1.18 IR-spectrum of 2-(6-azidomethyl)-pyridine-5-carboxylic acid (**7 = 1b**).
2. NMR- and IR-investigations for the synthesis of star-shaped picolinazido-telechelic PIBs (**2a**, **2b**).
  - 2.1  $^1\text{H}$ -NMR of star-shaped picolinazido-telechelic PIB (**2a**).
  - 2.2 IR-spectrum of star-shaped picolinazido-telechelic PIB (**2a**).
  - 2.3 IR-spectrum of star-shaped picolinazido-telechelic PIB (**2b**).
3. *In Situ* NMR kinetic plot obtained by converting 2-(6-azidomethyl)-pyridine-4-carboxylic acid methyl ester and phenylacetylene conducted in  $\text{THF-d}_8$ : Here shown exemplary for Table 1, entry 7:  $\text{CuBr}$ , DIPEA (0.01 eq.).
4. IR-investigations of finally obtained networks after rheological investigations: Here shown exemplary for Table 2, entry 5 (**2a** + **3**, 20 °C,  $\text{CuF}(\text{PPh}_3)_3$ ) and for Table 2, entry 7 (**2b** + **3**, 10 °C,  $\text{CuF}(\text{PPh}_3)_3$ ).
  - 4.1 IR-spectrum of polymer network obtained by cross-linking of **2a** + **3**.
  - 4.2 IR-spectrum of polymer network obtained by cross-linking of **2b** + **3**.
5. Fluorescence measurements of reference samples.
  - 5.1 Fluorescence measurement of unscratched specimen.
  - 5.2 Fluorescence measurement of scratched specimen without  $\text{CuBr}(\text{PPh}_3)_3$ .

1. NMR- and IR-investigations for the synthesis of 2-(6-azidomethyl)-pyridine-4-carboxylic acid (**1a**) and 2-(6-azidomethyl)-pyridine-5-carboxylic acid (**1b**).

Synthetic-route to obtain 2-(6-azidomethyl)-pyridine-4-carboxylic acid (**4 = 1a**):

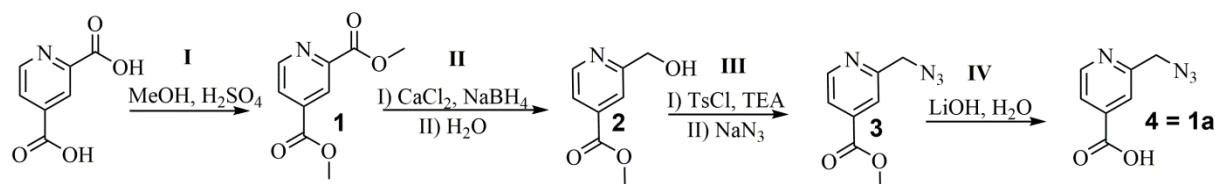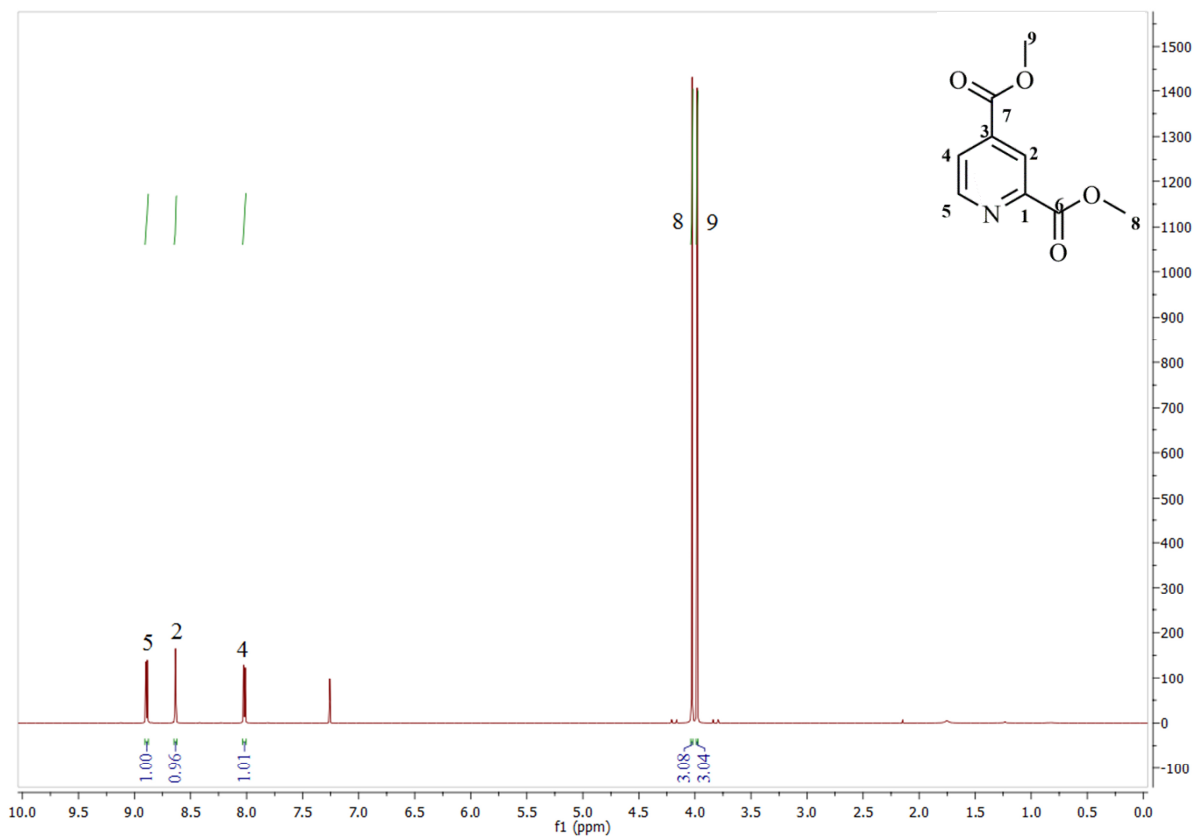

Figure S1. <sup>1</sup>H-NMR of pyridine-2,4-carboxylic acid dimylester (**1**) in CDCl<sub>3</sub>.

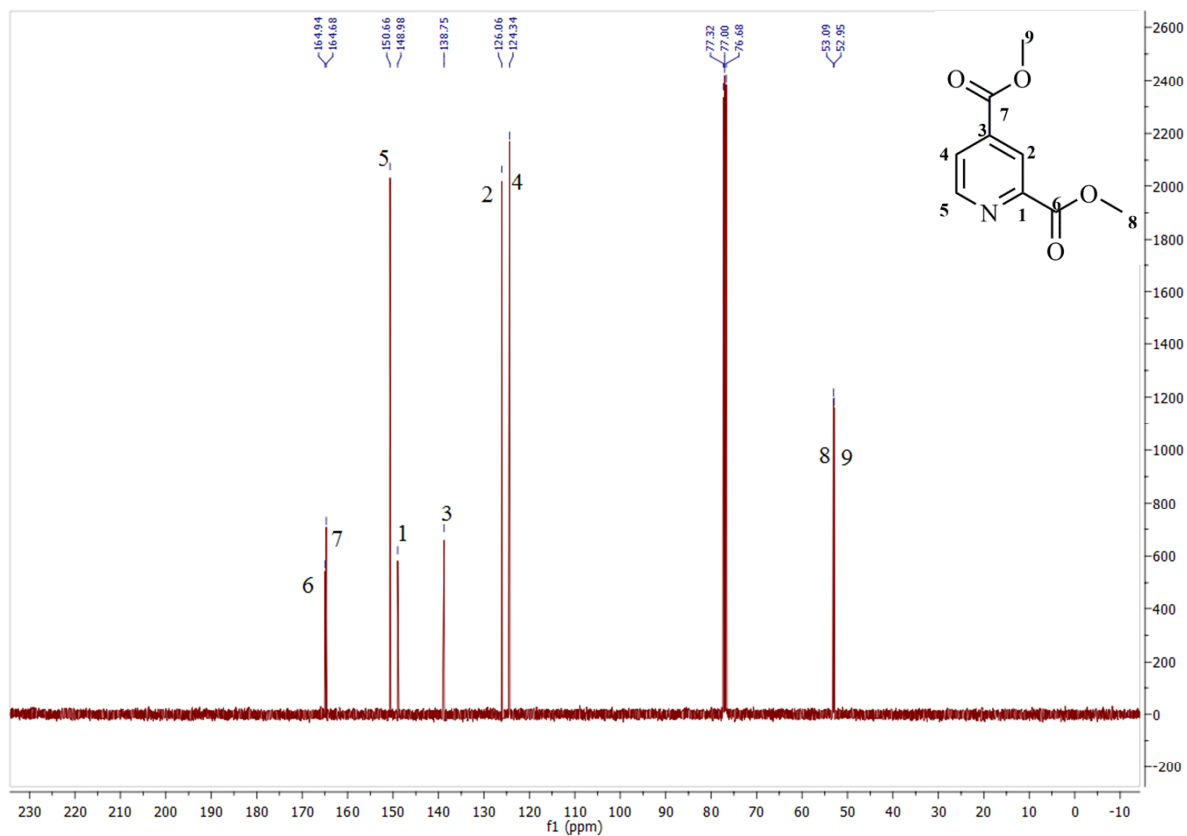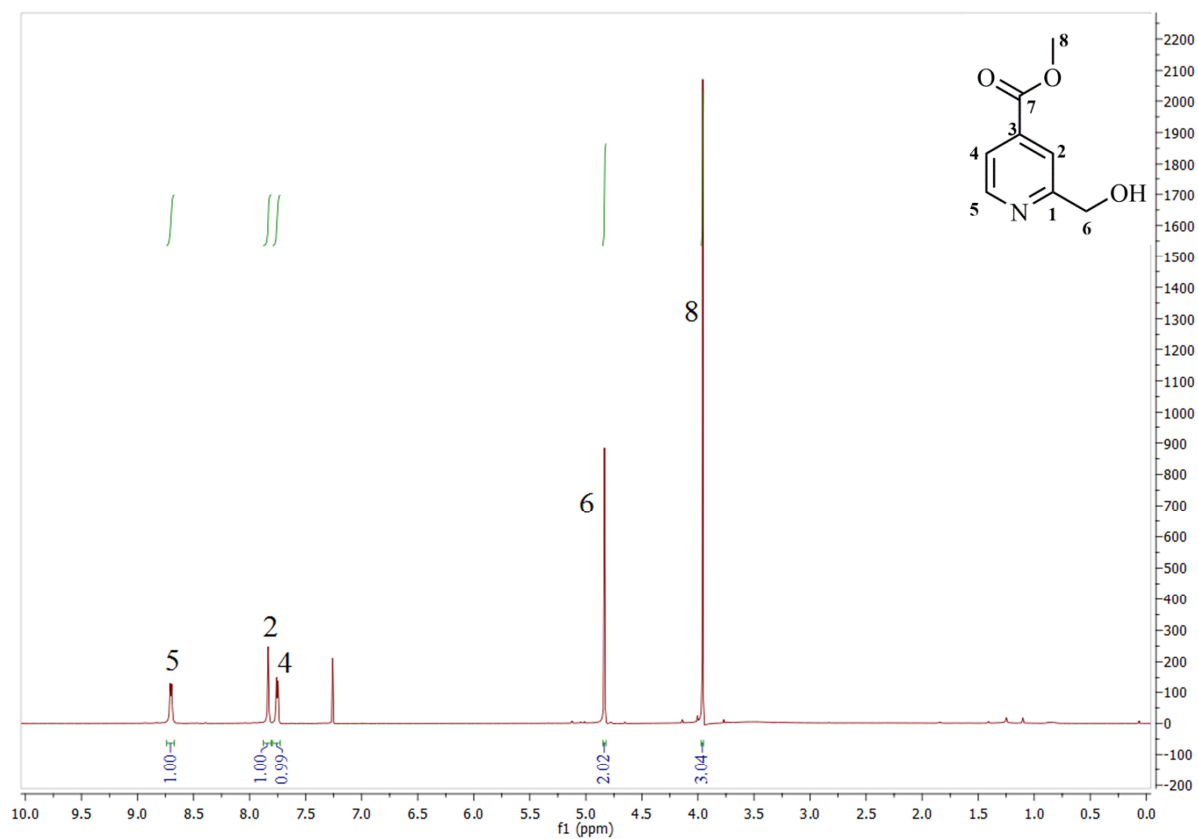

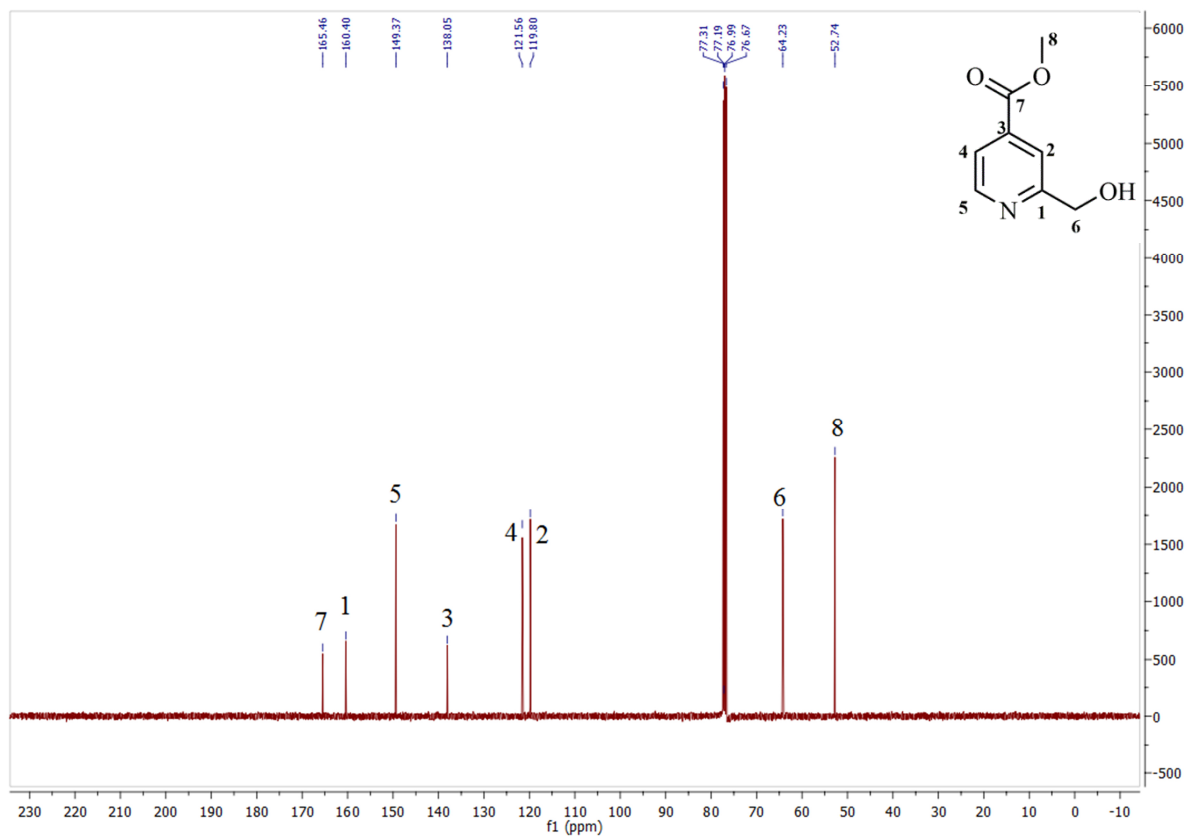

Figure S4.  $^{13}\text{C}$ -NMR of 2-(6-hydroxymethyl)-pyridine-4-carboxylic acid methylester (**2**) in  $\text{CDCl}_3$ .

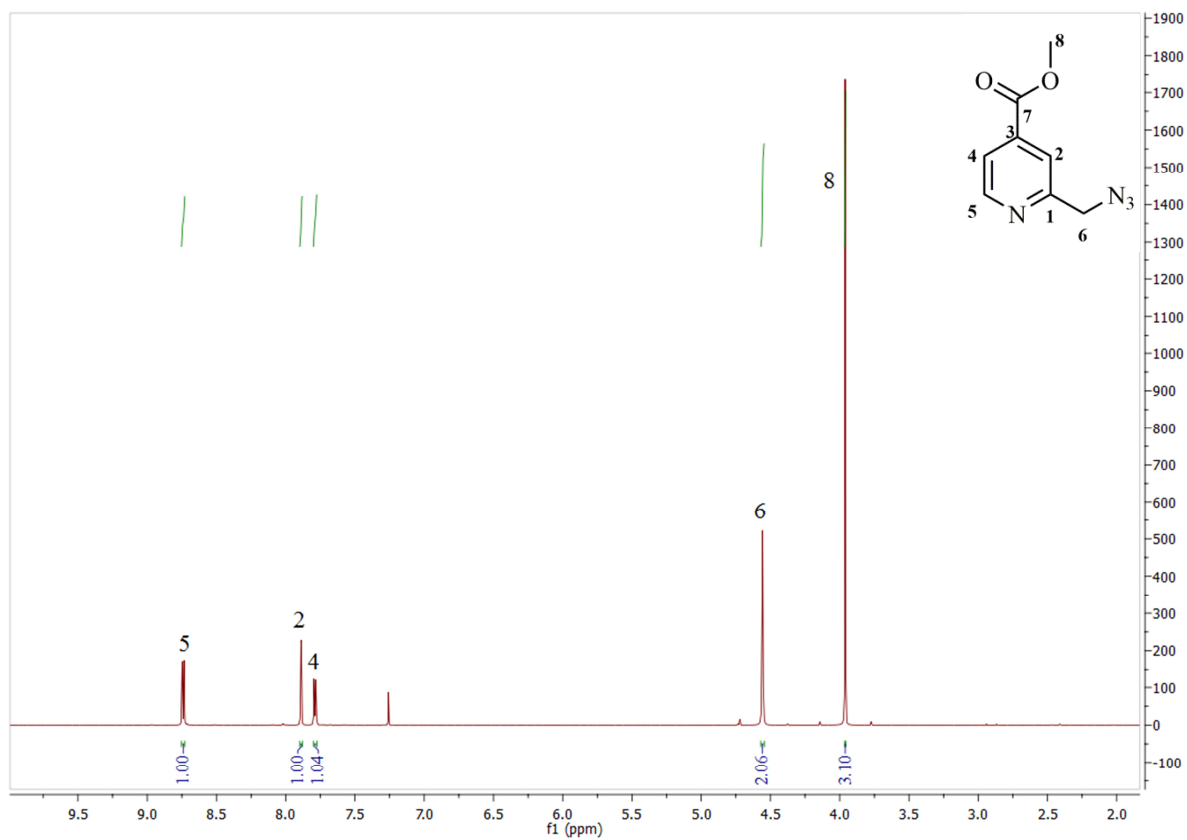

Figure S5.  $^1\text{H}$ -NMR of 2-(6-azidomethyl)-pyridine-4-carboxylic acid methylester (**3**) in  $\text{CDCl}_3$ .

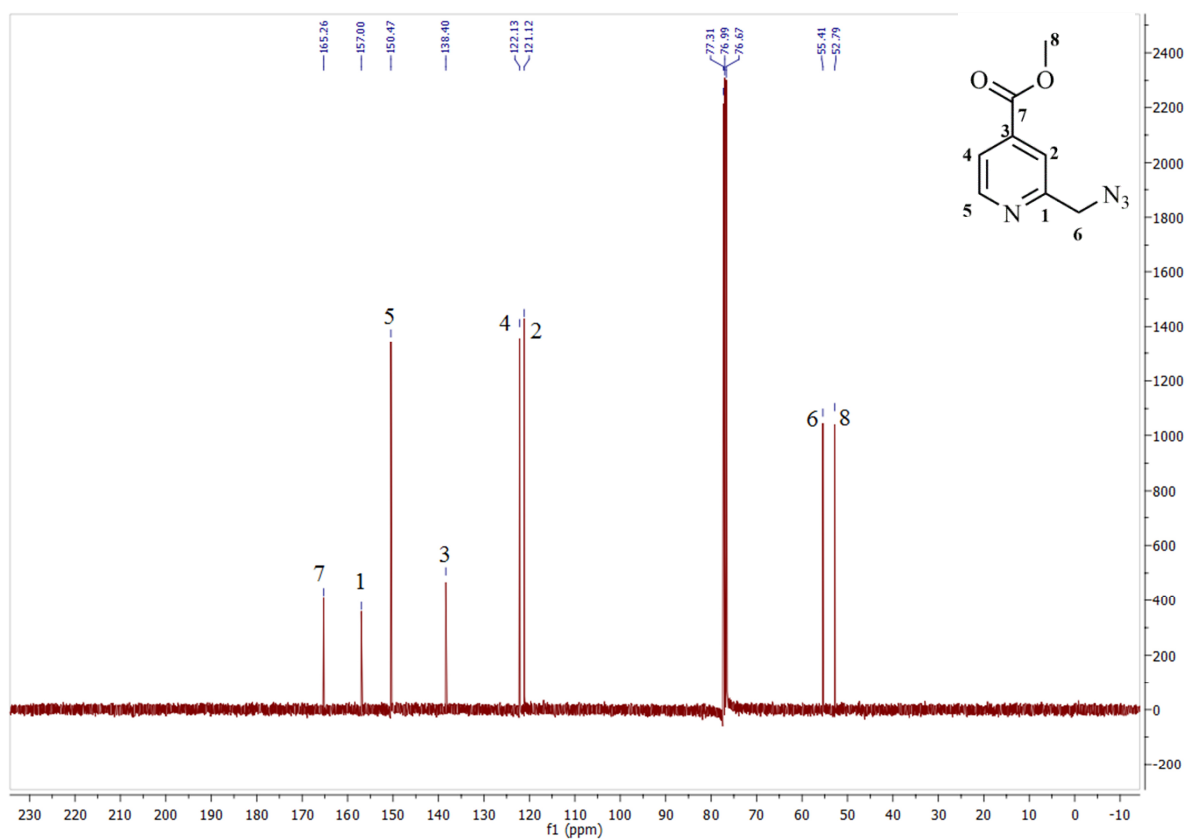

Figure S6.  $^{13}\text{C}$ -NMR of 2-(6-azidomethyl)-pyridine-4-carboxylic acid methylester (**3**) in  $\text{CDCl}_3$ .

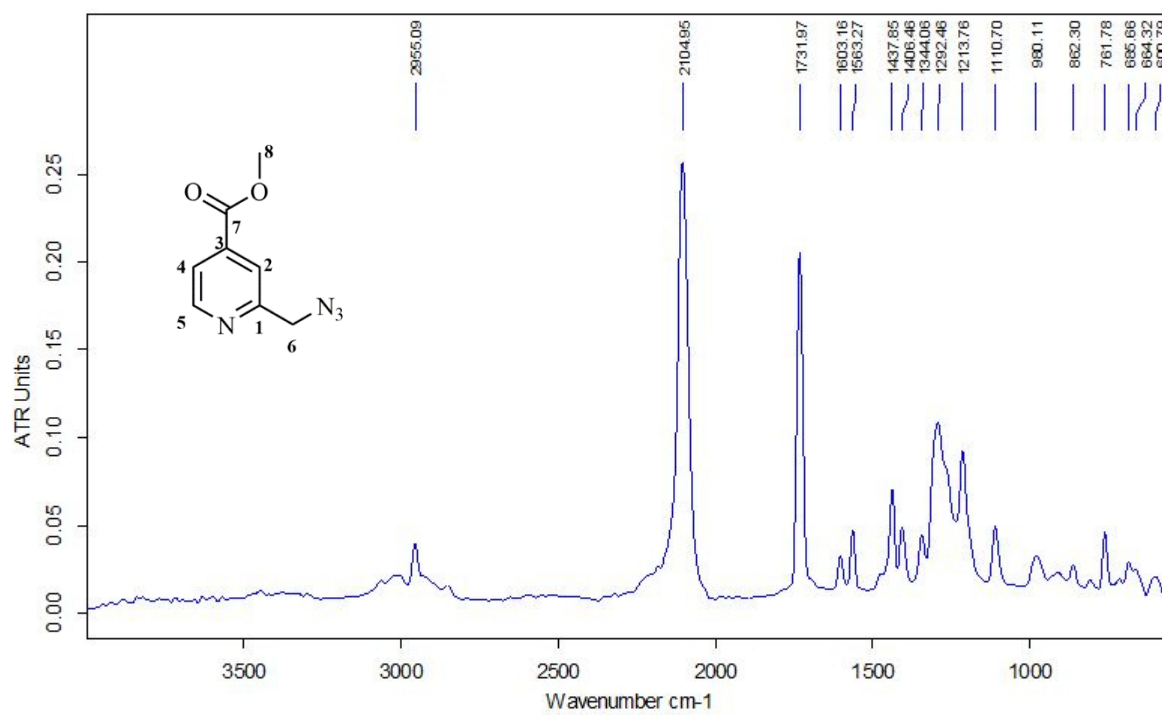

Figure S7. IR-spectrum of 2-(6-hydroxymethyl)-pyridine-4-carboxylic acid methylester (**3**).

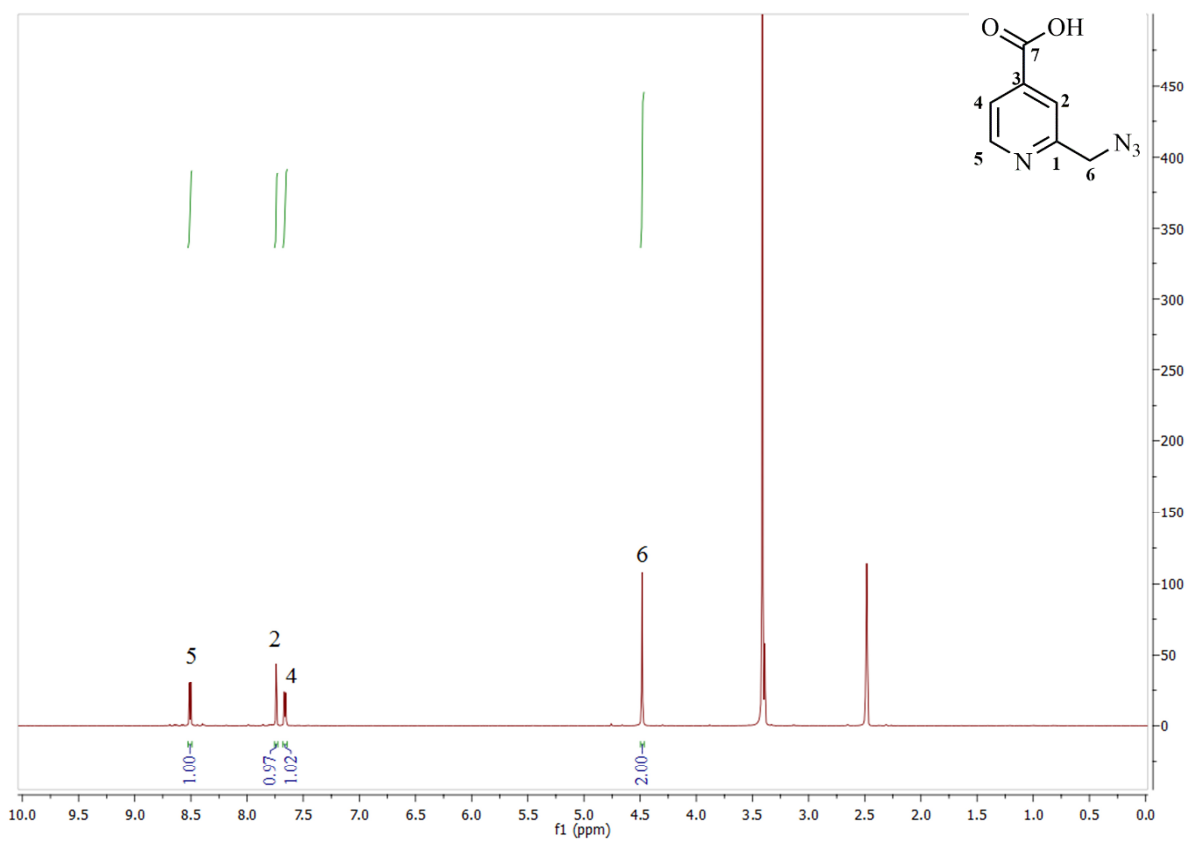

Figure S8.  $^1\text{H-NMR}$  of 2-(6-azidomethyl)-pyridine-4-carboxylic acid (**4 = 1a**) in  $\text{DMSO-d}_6$ .

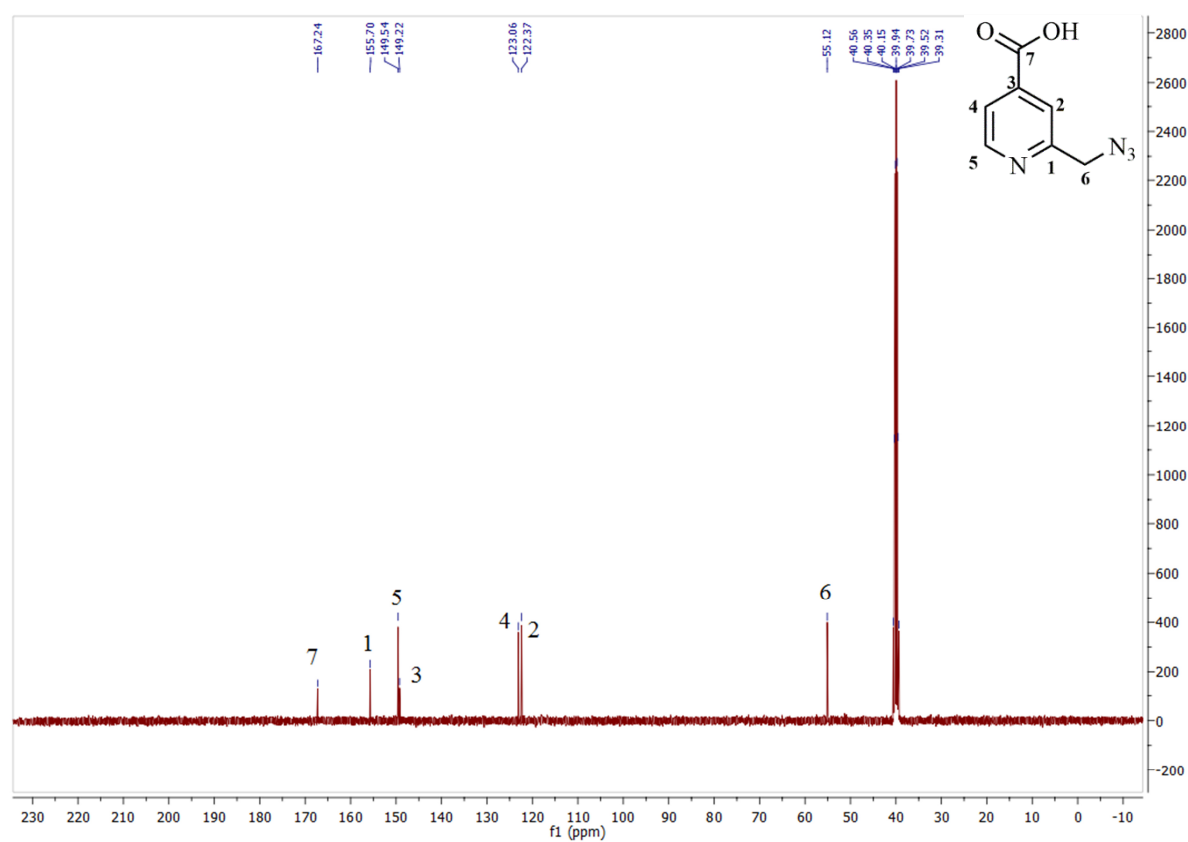

Figure S9.  $^{13}\text{C-NMR}$  of 2-(6-azidomethyl)-pyridine-4-carboxylic acid (**4 = 1a**) in  $\text{DMSO-d}_6$ .

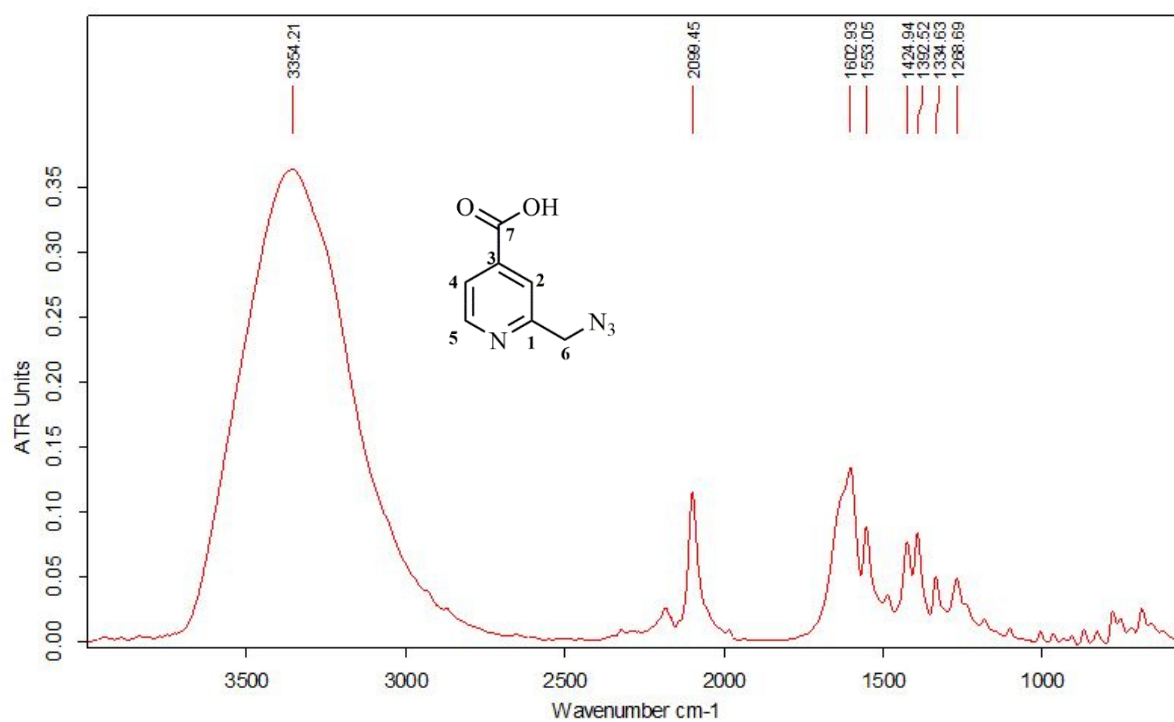

Figure S10. IR-spectrum of 2-(6-azidomethyl)-pyridine-4-carboxylic acid (**4 = 1a**).

Synthetic route to obtain 2-(6-azidomethyl)-pyridine-5-carboxylic acid (**7 = 1b**):

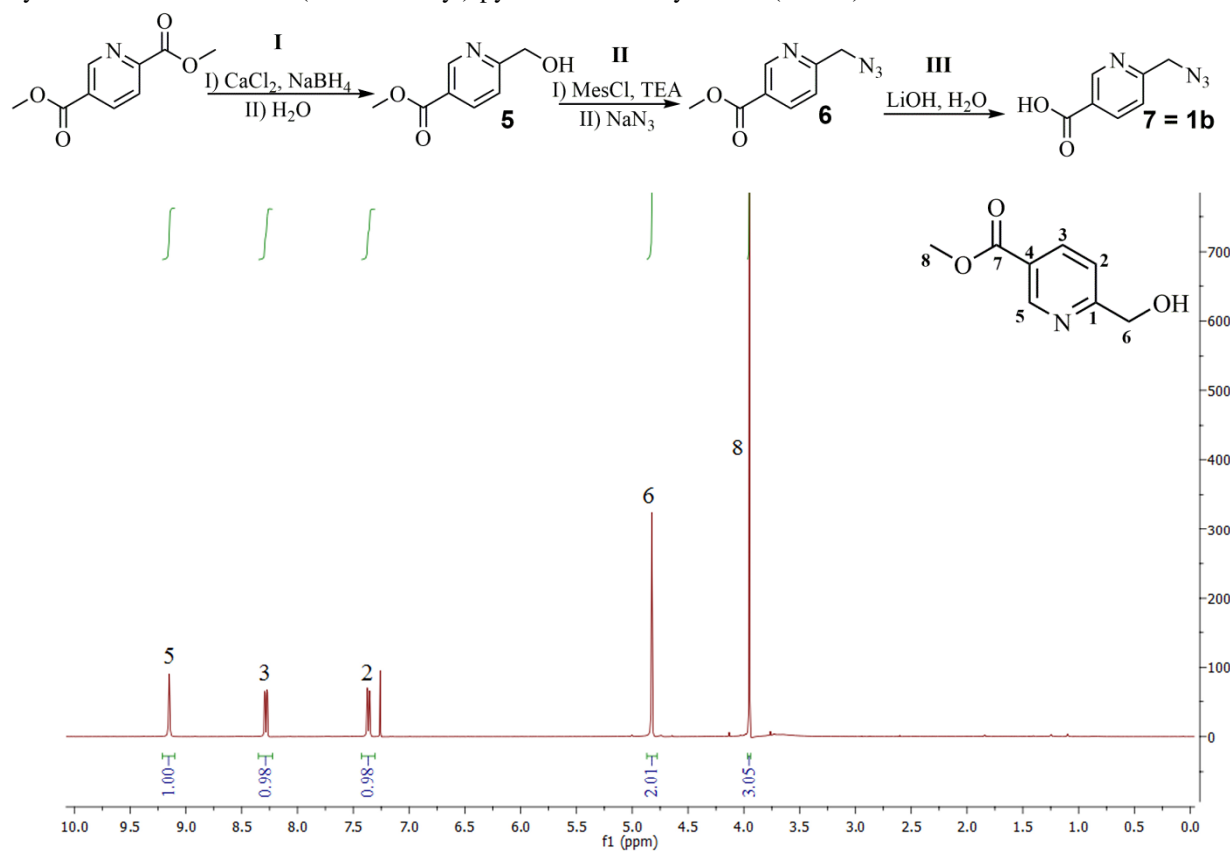

Figure S11.  $^1\text{H-NMR}$  of 2-(6-hydroxymethyl)-pyridine-5-carboxylic acid methylester (**5**) in  $\text{CDCl}_3$ .



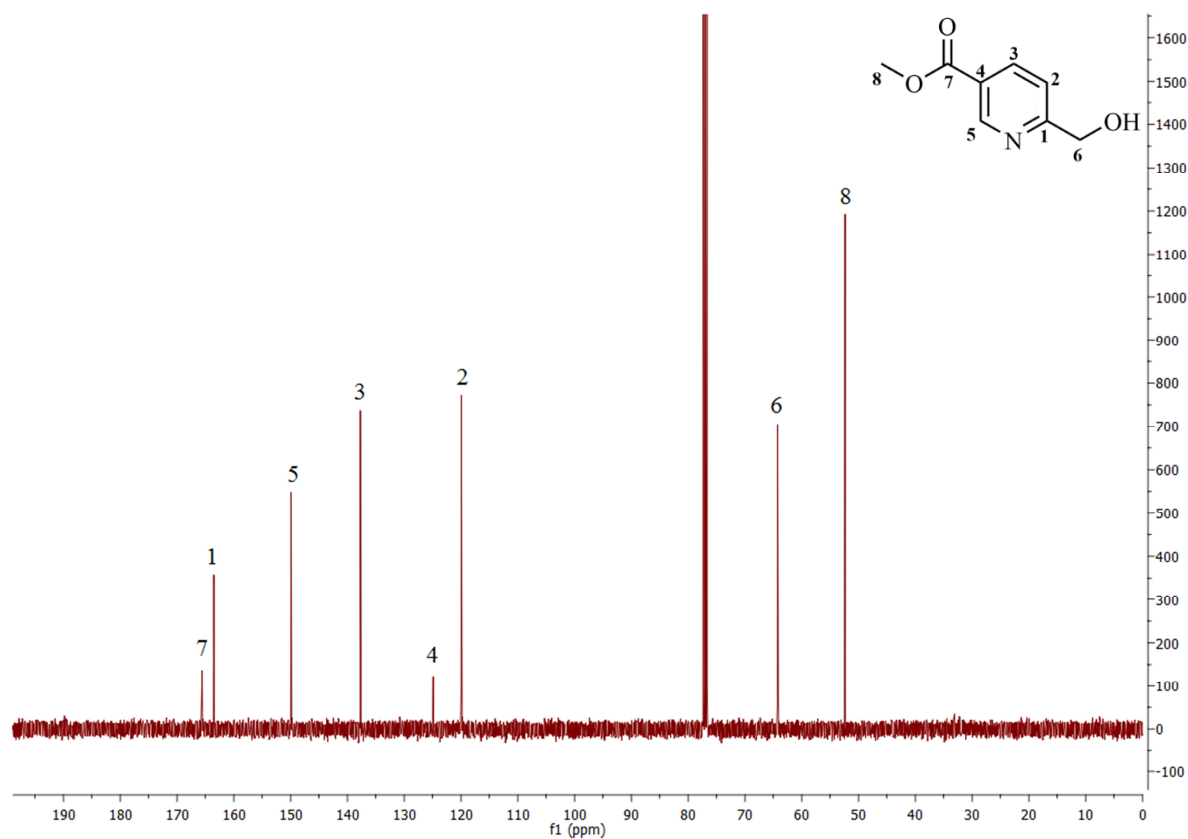

Figure S12.  $^{13}\text{C}$ -NMR of 2-(6-hydroxymethyl)-pyridine-5-carboxylic acid methylester (**5**) in  $\text{CDCl}_3$ .

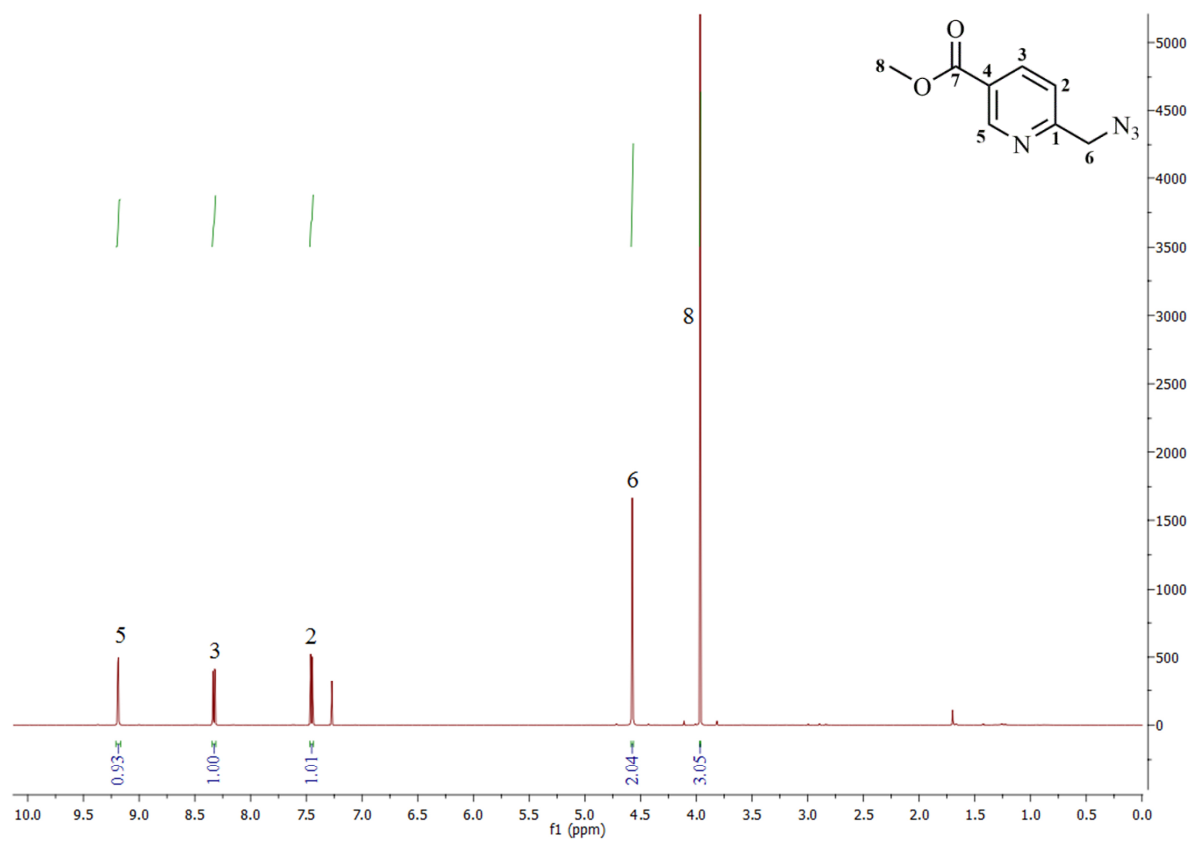

Figure S13.  $^1\text{H}$ -NMR of 2-(6-azidomethyl)-pyridine-5-carboxylic acid methylester (**6**) in  $\text{CDCl}_3$ .

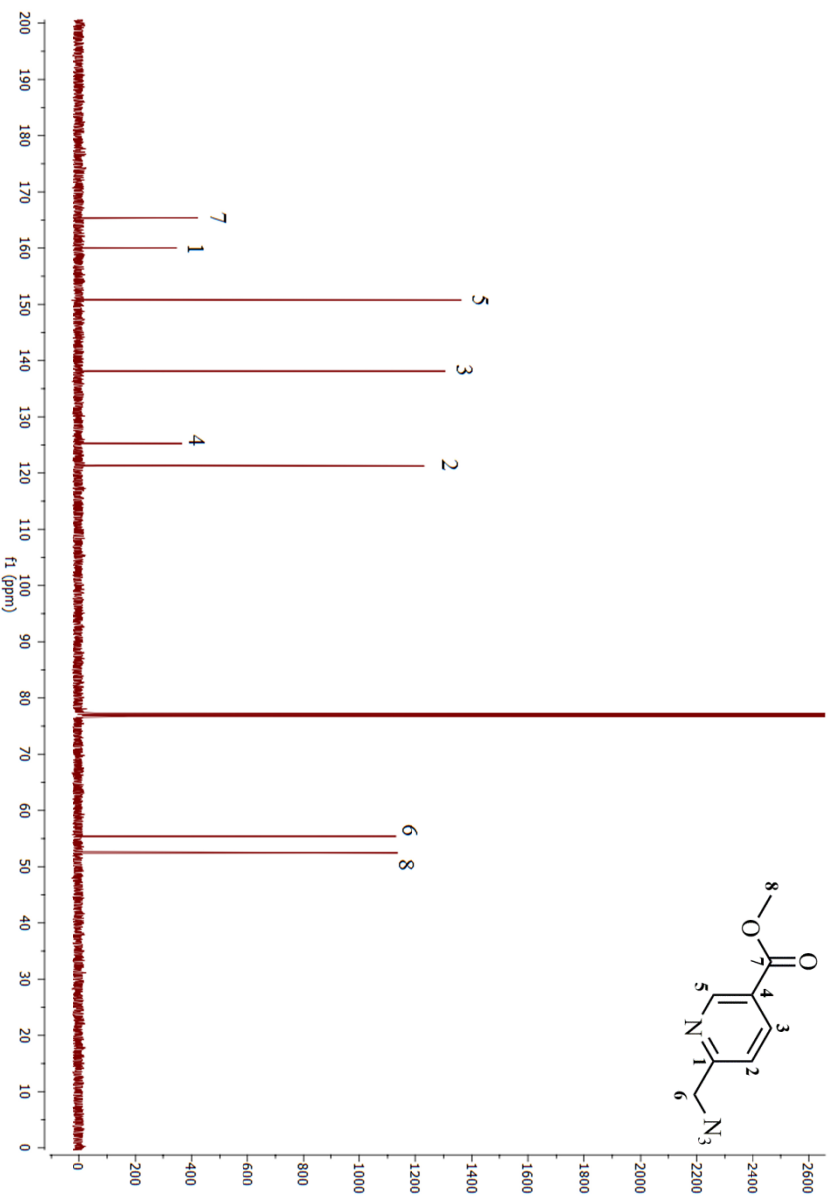

Figure S14. <sup>13</sup>C-NMR of 2-(6-hydroxymethyl)-pyridine-5-carboxylic acid methyl ester (6) in CDCl<sub>3</sub>.

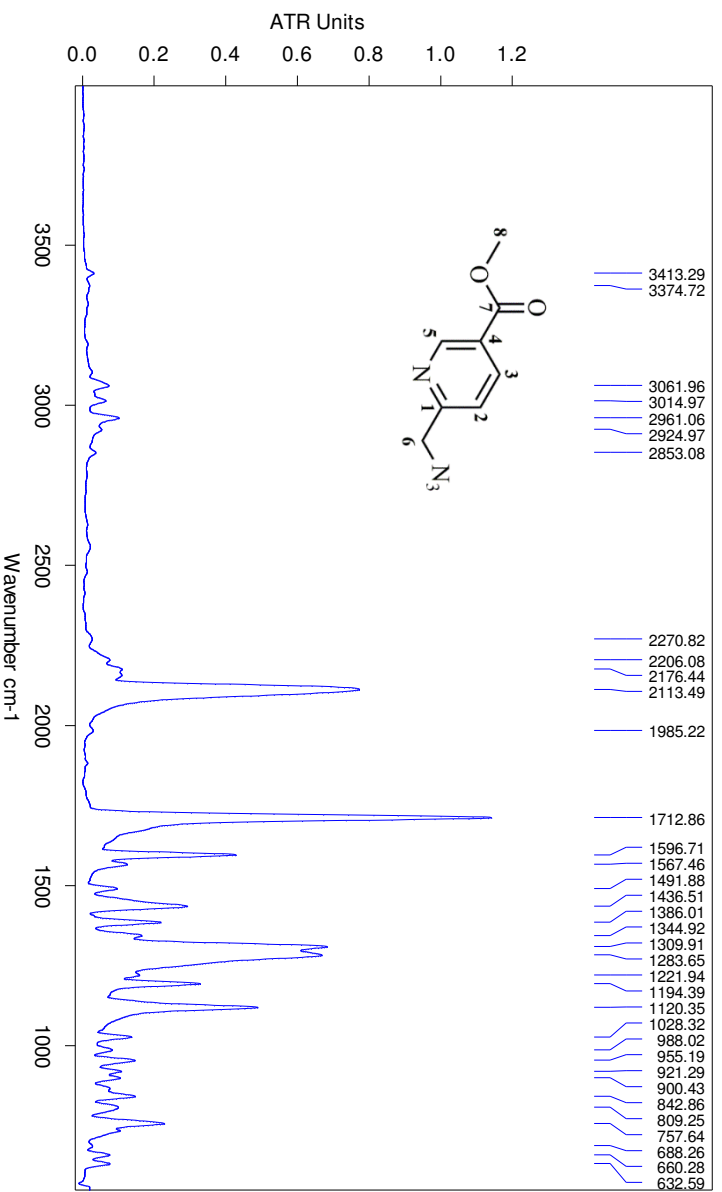

Figure S15. IR-spectrum of 2-(6-hydroxymethyl)-pyridine-4-carboxylic acid methyl ester (6).

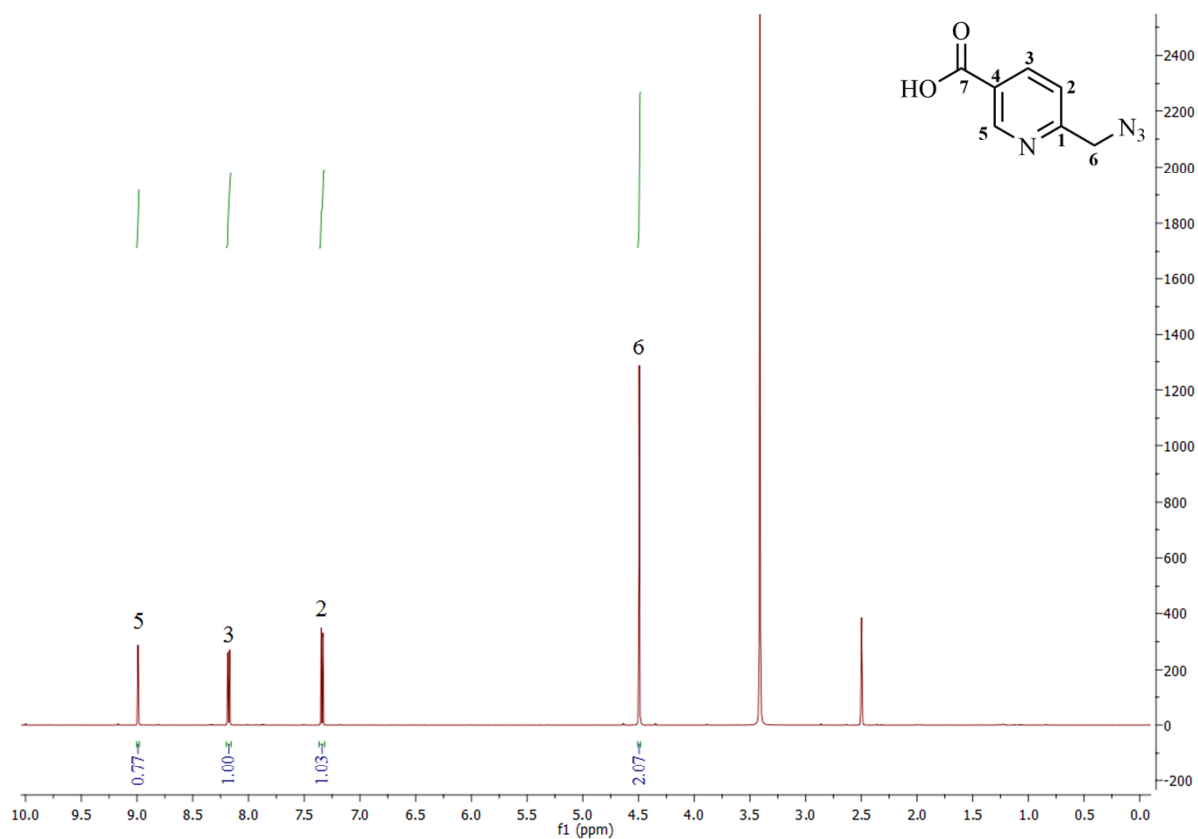

Figure S16.  $^1\text{H-NMR}$  of 2-(6-azidomethyl)-pyridine-5-carboxylic acid (**7 = 1b**) in  $\text{DMSO-d}_6$ .

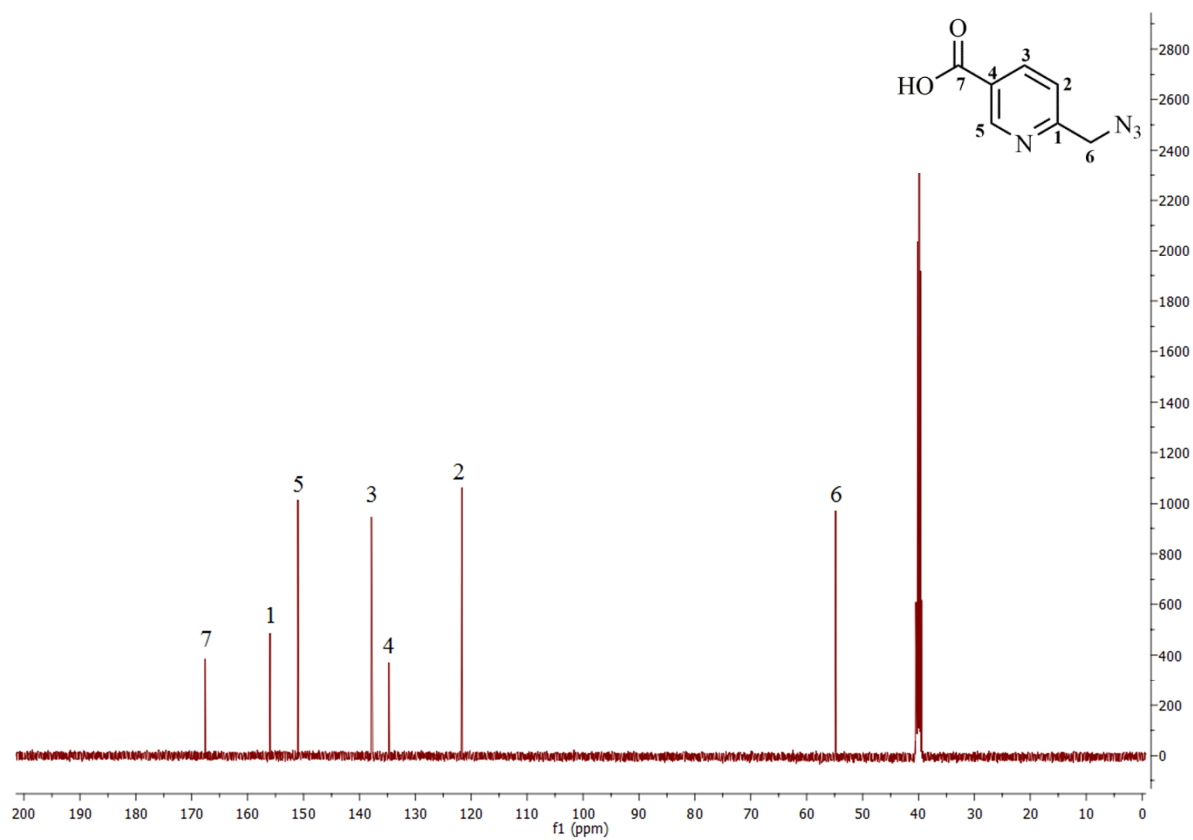

Figure S17.  $^{13}\text{C-NMR}$  of 2-(6-azidomethyl)-pyridine-5-carboxylic acid (**7 = 1b**) in  $\text{DMSO-d}_6$ .



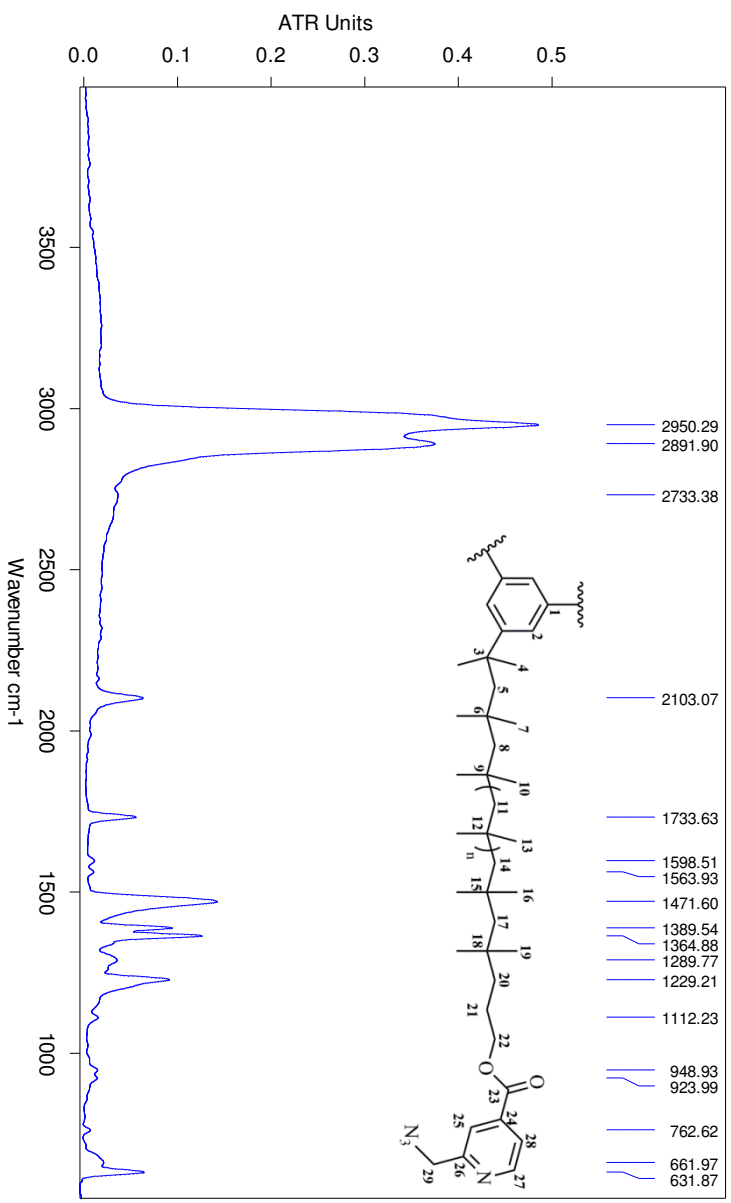

Figure S20. IR-spectrum of star-shaped picolinazido-telechelic PIB (**2a**).

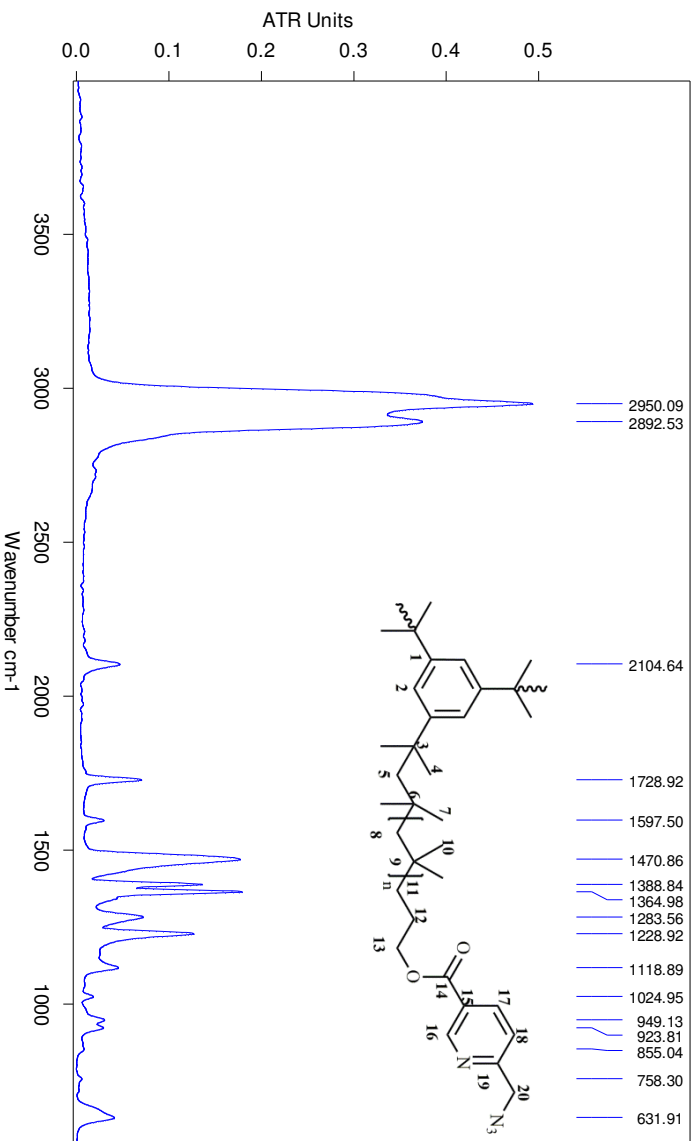

Figure S21. IR-spectrum of star-shaped picolinazido-telechelic PIB (**2b**).

3. *In Situ* NMR kinetic plot by conversion of 2-(6-azidomethyl)-pyridine-4-carboxylic acid methyl ester and phenylacetylene: - here shown exemplary for Table 1, entry 7: CuBr, DIPEA (0.01 eq.):

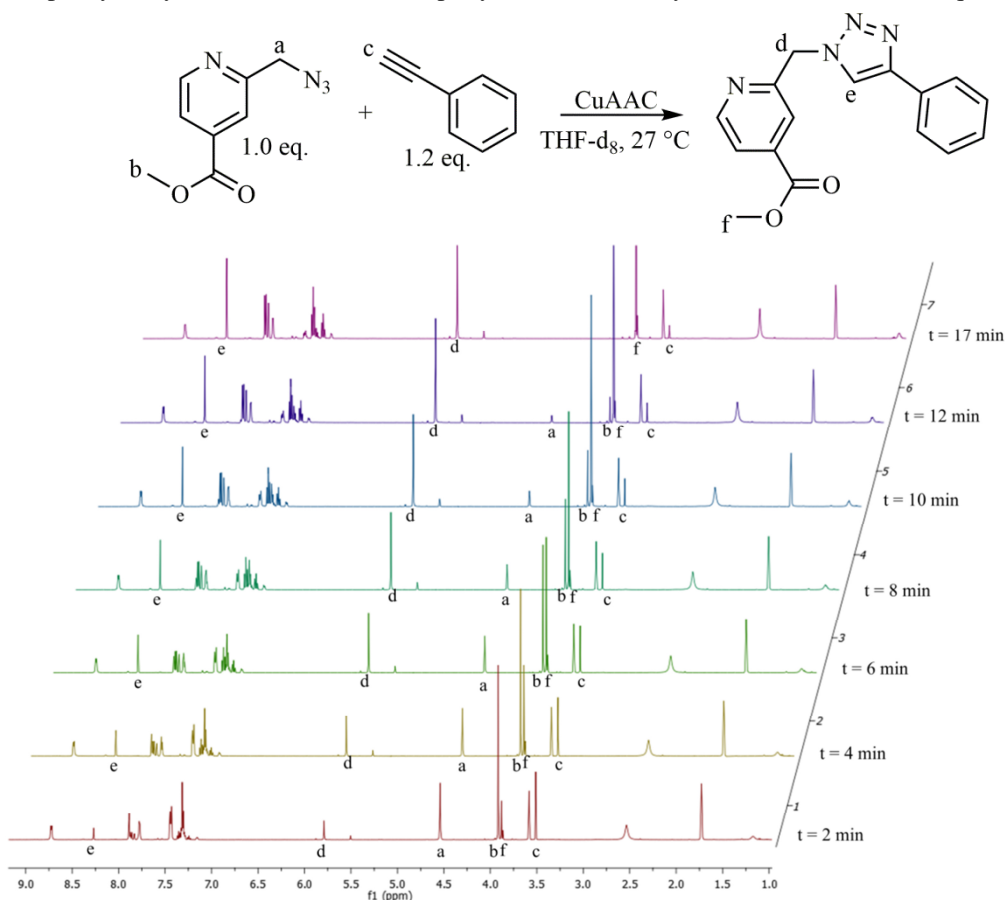

Figure S22.  $^1\text{H-NMR}$  kinetic-plot (Table 1, entry 7) conducted in  $\text{THF-d}_8$ .

To determine the conversion at different defined periods of time the integrals of the corresponding resonances (a) and (d) were chosen. Calculation was done according to the following equation (S1):

$$\text{conversion} = \frac{\text{integral of resonance d}}{(\text{integral of resonance d} + \text{integral of resonance a})} * 100 \% \quad (\text{S1})$$

When resonance (a) disappears the conversion to the final click-product was seen as complete (> 99 %).

4. IR investigation of cross-linked networks after rheological investigations:  
Here shown exemplary for Table 2, entry 5 (**2a** + **3**, 20 °C, CuF(PPh<sub>3</sub>)<sub>3</sub>).

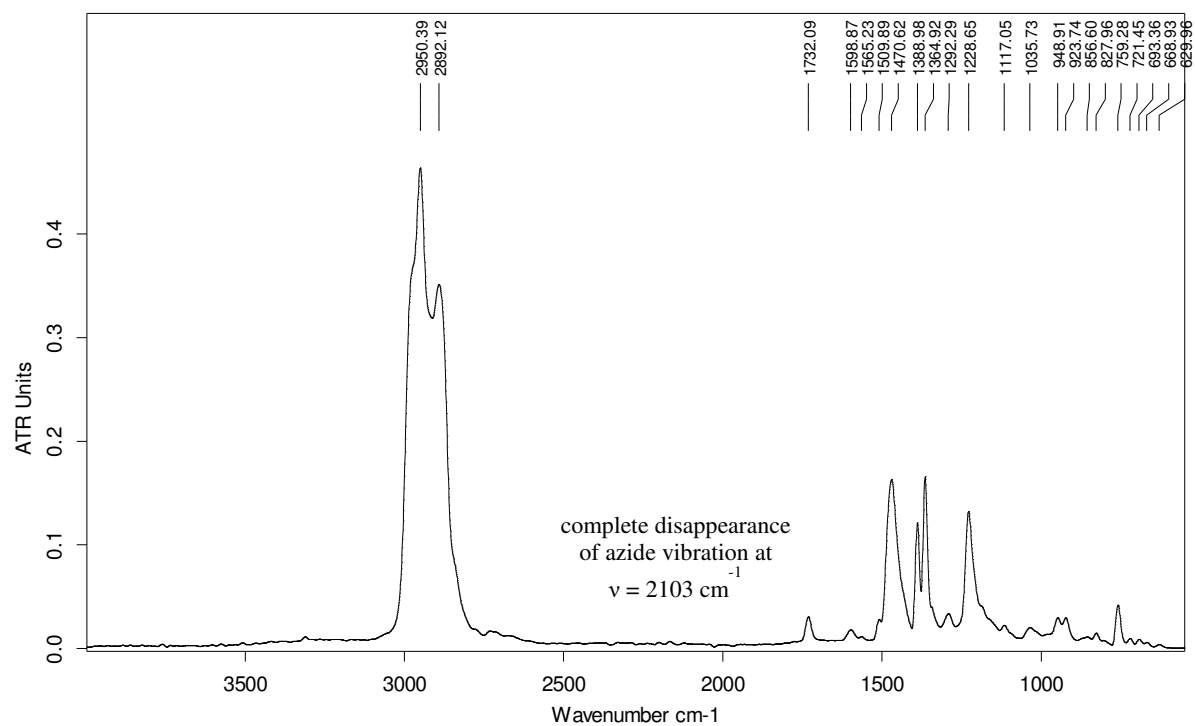

Figure S23. IR-spectrum of polymer network obtained by cross-linking of **2a** + **3**.

Here shown exemplary for Table 2, entry 7 (**2b** + **3**, 10 °C, CuF(PPh<sub>3</sub>)<sub>3</sub>).

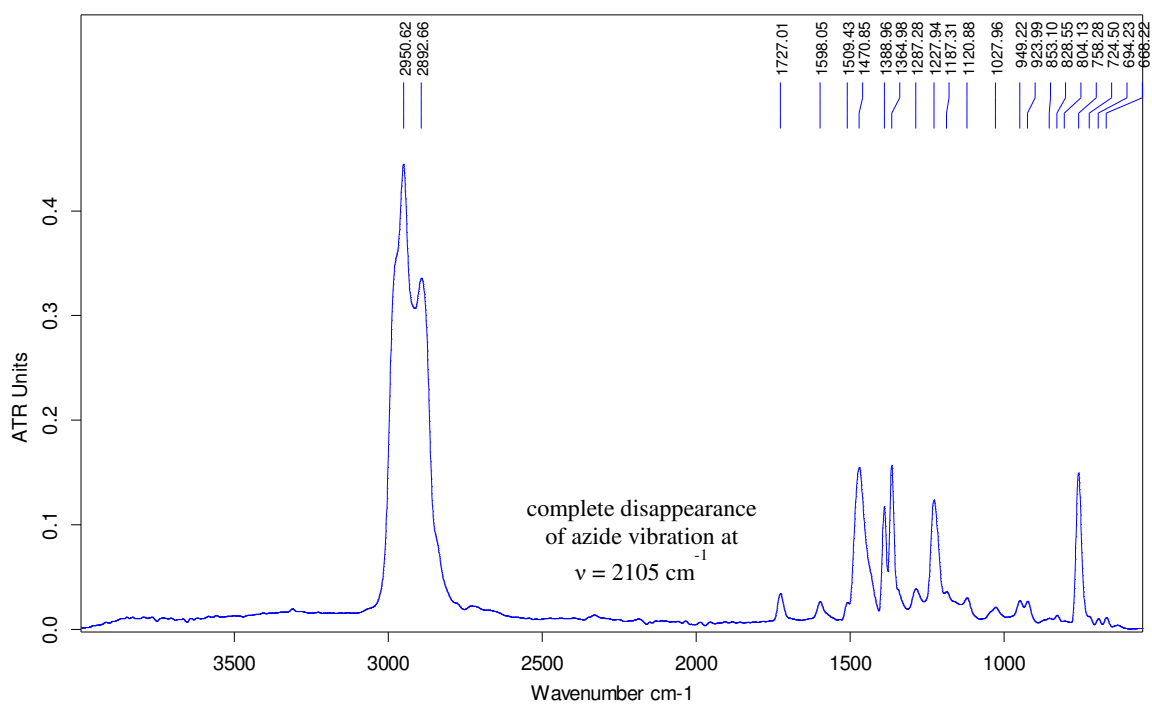

Figure S24. IR-spectrum of polymer network obtained by cross-linking of **2b** + **3**.

5. Fluorescence measurements of reference samples.

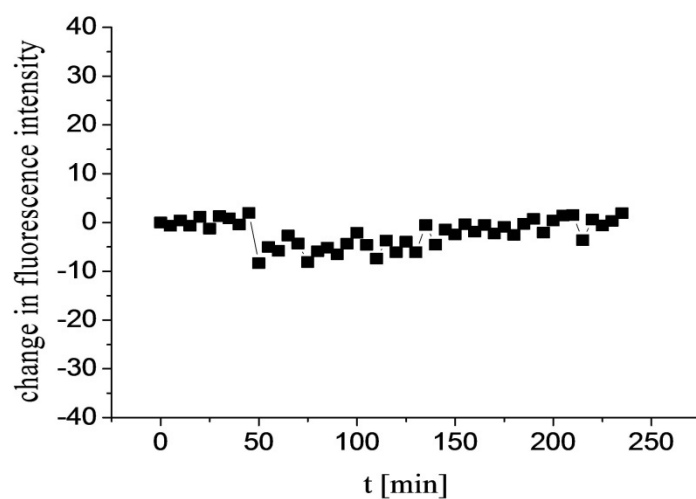

Figure S25. Fluorescence measurement of unscratched specimen.

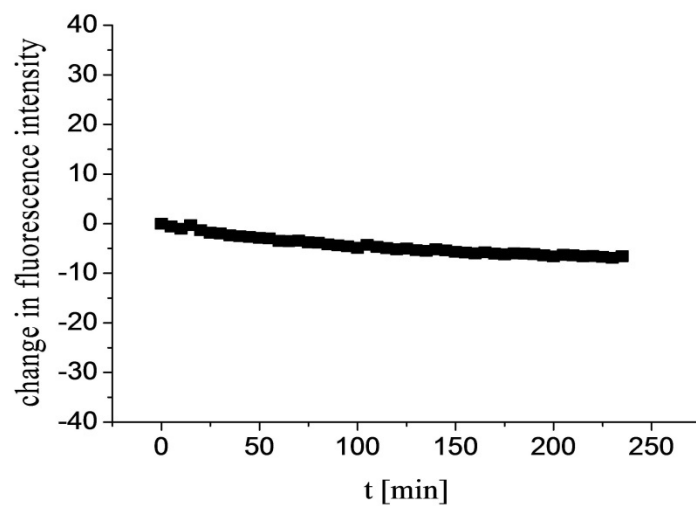

Figure S26. Fluorescence measurement of scratched specimen without  $\text{CuBr}(\text{PPh}_3)_3$ .
